## CORRECTION

# Pegylated leptin antagonist with strong orexigenic activity in mice is not effective in chickens

**A. Gertler, D. Shinder, S. Yosefi, M. Shpilman, C. I. Rosenblum, M. Ruzal, E. Seroussi and M. Friedman-Einat**

There was an error published in *J. Exp. Biol.* **217**, 180-184.

The last author's name was spelled incorrectly as M. Freidman-Einat. The correct spelling is above. This has been corrected online, but not in the print version of the article.

We apologise to the readers for any inconvenience this may have caused.
